# Supplementary material for: Survey of the UK veterinary profession: common species and conditions nominated by veterinarians in practice
Source: PubMed Central journal article supplement — Vet Rec. 2014 Feb 25;174(13):324. doi: 10.1136/vr.101745 (PMC3995283; doi:10.1136/vr.101745), 2014-02-25
Supplement: vetrec-2013-101745-s1.pdf [file vetrec-2013-101745-s1.pdf]

## **Appendix 1: Species list for common condition or complaints seen in practice**

Aquaculture – any aquatic organism kept for food production purposes

Camelids – alpacas and llamas

Cat

Cattle

Equine – included horses and donkeys

Dog

Ferret

Gerbil

Goat

Guinea Pig

Hamster

Mice

Laboratory animals – any animals kept for experimental purposes e.g. rats, mice, rabbits, hamsters

Ornamental fish – any fish kept for personal ownership e.g. not for food production

Other – any species deemed not to fit into the other species groups

Other small mammals – including responses such as ‘small furrries’ and more than one species e.g. ‘rats and hamsters’

Pet bird – including psittacines, other pet birds and back yard poultry

Pig

Poultry – any bird species kept for food production purposes

Rabbit

Rat

Reptiles – any pet reptile e.g. snakes, geckos, lizards

Sheep

Wildlife – any species occurring in the wild in the UK

Zoo – any animal not classified in the above groups that are kept in zoos, wildlife parks, nature reserves etc.
