# Supplementary material for: Survey of the UK veterinary profession: common species and conditions nominated by veterinarians in practice
Source: PubMed Central journal article supplement — Vet Rec. 2014 Feb 25;174(13):324. doi: 10.1136/vr.101745 (PMC3995283; doi:10.1136/vr.101745), 2014-02-25
Supplement: vetrec-2013-101745-s2.pdf [file vetrec-2013-101745-s2.pdf]

**Appendix 2: List of body system categories used to classify common conditions or complaints seen in practice. Adapted from Robinson 2013.**

|                              |                                                                                                                                                                                                                                                               |
|------------------------------|---------------------------------------------------------------------------------------------------------------------------------------------------------------------------------------------------------------------------------------------------------------|
| <b>Skin</b>                  | Any disease, injury or set of clinical signs primarily affecting the integumentary system including Otitis externa                                                                                                                                            |
| <b>Musculoskeletal</b>       | Any disease, injury or set of clinical signs primarily affecting the skeleton or skeletal muscles                                                                                                                                                             |
| <b>Neurological</b>          | Any disease, injury or set of clinical signs primarily affecting the central or peripheral nerves including conditions of the brain and spinal cord                                                                                                           |
| <b>Ophthalmology</b>         | Any disease, injury or set of clinical signs primarily affecting the eyes, eyelids (including third eyelid), tear ducts and other associated structures                                                                                                       |
| <b>Urinary</b>               | Any disease, injury or set of clinical signs primarily affecting the lower urinary tract including bladder and urethra                                                                                                                                        |
| <b>Renal</b>                 | Any disease, injury or set of clinical signs primarily affecting the upper urinary tract including the kidneys and ureters                                                                                                                                    |
| <b>Reproductive</b>          | Any disease, injury or set of clinical signs primary affecting the male or female reproductive tract, including prostate, testes, penis, uterus, ovaries, vagina, vulva and mammary glands, and encompassing problems of pregnancy, parturition and lactation |
| <b>Gastrointestinal</b>      | Any disease, injury or set of clinical signs primarily affecting the gastrointestinal tract, liver, gall bladder and pancreas (excluding Diabetes Mellitus)                                                                                                   |
| <b>Cardiovascular</b>        | Any disease, injury or set of clinical signs primarily affecting the cardiovascular system, including the heart, pericardium and blood vessels                                                                                                                |
| <b>Respiratory</b>           | Any disease, injury or set of clinical signs primarily affecting the respiratory system including lungs, trachea and nasal passages                                                                                                                           |
| <b>Haemopoetic/Lymphatic</b> | Any disease, injury or set of clinical signs primarily affecting the haemopoetic or lymphatic system including blood cell disorders, bone marrow disorders and problems of the lymph nodes                                                                    |

|                            |                                                                                                                                                                                                                |
|----------------------------|----------------------------------------------------------------------------------------------------------------------------------------------------------------------------------------------------------------|
| <b>Endocrine</b>           | Any disease, injury or set of clinical signs primarily affecting the endocrinological system including disorders of the pituitary, thyroid, adrenal or endocrine pancreas which results in a hormone imbalance |
| <b>Dental</b>              | Any disease, injury or set of clinical signs primarily affecting the teeth, gums or related structures                                                                                                         |
| <b>Preventive Medicine</b> | Any consultation where an animal perceived by its owner to be healthy is presented primarily for measures taken to prevent problems for that animal, for example relating to disease or injury                 |
| <b>Behaviour</b>           | Any activity judged to be outside the normal behaviour pattern for animals of that age, where no underlying medical or physiological abnormality can be found                                                  |
| <b>Client care</b>         | Anything relating to client issues, or client care within the veterinary practice e.g. relating to euthanasia                                                                                                  |
| <b>Non-specific</b>        | Any disease, injury or set of clinical signs which cannot be fitted into one of the above categories                                                                                                           |
