# Supplementary material for: Survey of the UK veterinary profession: common species and conditions nominated by veterinarians in practice
Source: PubMed Central journal article supplement — Vet Rec. 2014 Feb 25;174(13):324. doi: 10.1136/vr.101745 (PMC3995283; doi:10.1136/vr.101745), 2014-02-25
Supplement: vetrec-2013-101745-s3.pdf [file vetrec-2013-101745-s3.pdf]

**Appendix 3: Further detailed classification of body system used to classify common conditions or complaints seen in practice. Adapted from Robinson 2013.**

|                                   |                                    |                          |
|-----------------------------------|------------------------------------|--------------------------|
| Skin-Ear                          | Respiratory - Bronchial            | Non-specific-            |
| Skin-Ectoparasite                 | Respiratory-Nasal                  | Inappetance/Anorexia     |
| Skin-Nail/Pad                     | Respiratory-Parasites              | Non-specific-Weight Loss |
| Skin-Skin                         | Respiratory-Respiratory            | Non-specific-Pyrexia     |
| Skin-Non-specific                 | Respiratory-Pneumonia              | Non-specific-Septicaemia |
| MSK-Joint                         | Respiratory-Viral                  | Non-specific-Nutrition   |
| Musculoskeletal-Ligament          | Respiratory - Bacterial            | Non-specific-            |
| Musculoskeletal - Tendon          | Respiratory-Non-specific           | Hoof/Horn/Shell          |
| Musculoskeletal-Muscle            | Haemopoetic/Lymphatic-Clotting     | Non-specific-Death       |
| Musculoskeletal-Musculoskeletal   | Haemopoetic/Lymphatic-RBC          | Non-specific-Polydipsia  |
| Musculoskeletal-Skeletal          | Haemopoetic/Lymphatic-Splenic      | Non-specific-Lethargy    |
| Musculoskeletal-Laminitis         | Haemopoetic/Lymphatic-WBC          | Non-specific-Poor        |
| Musculoskeletal-Non-specific      | Haemopoetic/Lymphatic-Non-specific | Performance              |
| Neurological-Brain                | Haemopoetic/Lymphatic-             | Non-specific-Collapse    |
| Neurological-Neurological         | Haemopoetic/Lymphatic-             | Non-specific-Ilthrift    |
| Neurological-Nerve                | Haemopoetic/Lymphatic              | Preventive Medicine-     |
| Neurological-Spinal               | Reproductive-Mammary               | Microchipping            |
| Neurological-Non-specific         | Reproductive-Ovarian               | Preventive Medicine-     |
| Ophthalmology-Eyelid              | Reproductive-Penile                | Vaccination              |
| Ophthalmology-Globe               | Reproductive-Uterus                | Preventive Medicine-     |
| Ophthalmology-Tear Duct           | Reproductive-Prostatic             | Desexing                 |
| Ophthalmology-Third Eyelid        | Reproductive-Testicular            | Preventive Medicine-     |
| Ophthalmology-Ophthalmology       | Reproductive-Vagina                | Parasite (Ectoparasite)  |
| Ophthalmology-Non-specific        | Reproductive-Reproductive          | Preventive Medicine-     |
| Gastrointestinal-Anal             | Reproductive-Non-specific          | Parasite (Endoparasite)  |
| Gastrointestinal-Colo/Rectal      | Renal-Renal                        | Preventive Medicine-     |
| Gastrointestinal-Gastrointestinal | Renal-Non-specific                 | Parasite (General)       |
| Gastrointestinal-Stomach          | Urinary-Bladder                    | Preventive Medicine-     |
| Gastrointestinal-Liver            | Urinary-Urinary                    | Non-specific             |
| Gastrointestinal-Bile duct        | Urinary-Non-specific               | Preventive Medicine-     |
| Gastrointestinal-Intestinal       | Endocrine-Adrenal                  | Preventive Medicine      |
| Gastrointestinal-Oesophageal      | Endocrine-Pancreatic               | Client Care-Euthanasia   |
| Gastrointestinal-Pancreatic       | Endocrine-Thyroid                  | Client Care-Client Care  |
| Gastrointestinal-Parasites        | Endocrine-Non-specific             | Client Care-Non-specific |
| Gastrointestinal-Non-specific     | Endocrine-Endocrine                |                          |
| Dental-Dental                     | Behaviour-Behaviour                |                          |
| Dental-Oral                       | Behaviour-Non-specific             |                          |
| Dental-Non-specific               | Non-specific-Bacterial             |                          |
| Cardiovascular-Cardiac            | Non-specific-Hernia/rupture        |                          |
| Cardiovascular-Cardiovascular     | Non-specific-Non-specific          |                          |
| Cardiovascular-Circulatory        | Non-specific-Toxicity              |                          |
| Cardiovascular-Non-specific       | Non-specific-Protozoal             |                          |
| Respiratory-Larynx/Tracheal       | Non-specific-Viral                 |                          |
| Respiratory-Lung                  | Non-specific-Parasites             |                          |
| Respiratory-Mediastinal           | Non-specific-Trauma                |                          |
|                                   | Non-specific-Tumour/Mass/Lump      |                          |

Criteria for this level of classification were constructed for transparency:

- If a specific disease was named, it was classified fully according to the features of the disease e.g. 'cranial cruciate ligament rupture' would become 'Musculoskeletal-Ligament'
- If the terminology was vague and non-specific for a particular disease, it was classified according to the main site or body system location most closely associated e.g. 'parasitic skin disease' would become 'Skin-Ectoparasite'
- If the terminology was non-specific and vague and wasn't able to be classified according to the main site or body system location of the problem, it was classified as 'Non-specific' e.g. 'nutrition problems' would become 'Non-specific-Nutrition'
- If the terminology was very general but a body system could be assigned, it was classified according to body system followed by 'Non-specific' e.g. 'respiratory disease' would become 'Respiratory-Non-specific'
- If the terminology was more related to a specific problem, without aetiology, it was classified according to body system followed by a further level of body system coding e.g. 'dysuria' would become 'Urinary-Urinary'
