# Supplementary material for: Survey of the UK veterinary profession: common species and conditions nominated by veterinarians in practice
Source: PubMed Central journal article supplement — Vet Rec. 2014 Feb 25;174(13):324. doi: 10.1136/vr.101745 (PMC3995283; doi:10.1136/vr.101745), 2014-02-25
Supplement: vetrec-2013-101745-s4.pdf [file vetrec-2013-101745-s4.pdf]

#### **Appendix 4: Criteria for coding if the condition or complaint was a disease or clinical sign**

- If it was something an owner would present the animal for, or something that would be detected on a veterinarians' clinical exam, or was a lab finding, it was classified as a clinical sign e.g. 'apathy' and 'haematuria' would be classified as 'Clinical sign'
- If a specific disease was named, it was classified as a disease e.g. 'hyperadrenocorticism' or 'Johne's disease' would be classified as 'Disease'
- If the terminology used could be a clinical sign, but also something that veterinarians would use to commonly describe something that was considered a disease, it was classified as 'Both' e.g. 'mastitis' or 'hypocalcemia' would be classified as 'Both'
- If the terminology was too vague to be considered either a clinical sign or a specific disease, or it couldn't be classified, it was classified as 'Unclassifiable' e.g. 'zoonoses' or 'production diseases' would be classified as 'Unclassifiable'
